# Supplementary material for: Prognostic value and prospective molecular mechanism of miR-100-5p in hepatocellular carcinoma: A comprehensive study based on 1,258 samples
Source: PubMed Central journal article supplement — Oncol Lett. 2019 Oct 4;18(6):6126–42. doi: 10.3892/ol.2019.10962 (PMC6865135; doi:10.3892/ol.2019.10962), 2019-10-04
Supplement: Supplementary_Data.pdf [file Supplementary_Data.pdf]

Figure S1. Alterations and expression of hub genes in 360 patients with hepatocellular carcinoma from the cBioPortal database. (A) OncoPrint schematic of the alterations in HDAC2, HDAC3, SHC1, RAC1, IGF1R and CBL occurred in 7, 11, 21, 12, 11 and 6% of cases, respectively. (B) Expression heatmap of the hub genes. Blue indicates downregulation and red indicates upregulation. HDAC, histone deacetylase; SHC1, SHC-transforming protein 1; RAC1, Ras-related protein Rac1; IGF1R, insulin like growth factor 1 receptor; CBL, E3 ubiquitin-protein ligase CBL.

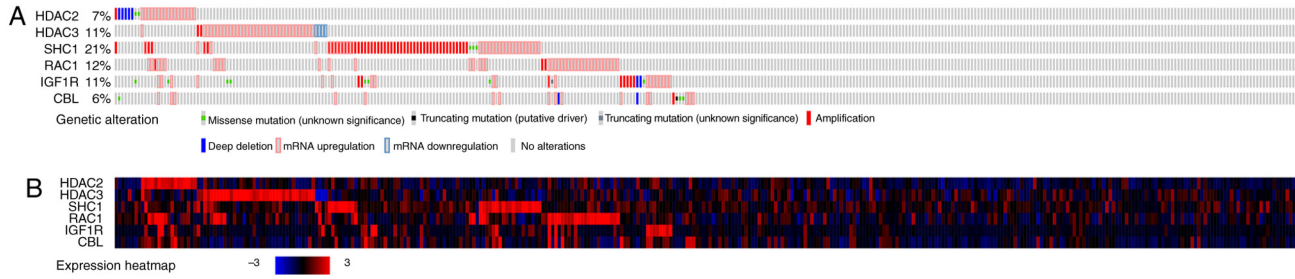

Figure S2. OS curves of 360 HCC cases with or without alterations of hub genes from the cBioPortal database. OS curve of HCC cases based on (A) HDAC2 alteration (log rank  $P=0.0213$ ), (B) HDAC3 alteration (log rank  $P=0.373$ ), (C) SHC1 alteration (log rank  $P=6.153 \times 10^{-3}$ ), (D) RAC1 alteration (log rank  $P=0.0144$ ), (E) IGF1R alteration (log rank  $P=0.474$ ) and (F) CBL alteration (log rank  $P=0.298$ ). OS, overall survival; HCC, hepatocellular carcinoma; HDAC, histone deacetylase; SHC1, SHC-transforming protein 1; RAC1, Ras-related protein Rac1; IGF1R, insulin like growth factor 1 receptor; CBL, E3 ubiquitin-protein ligase CBL.

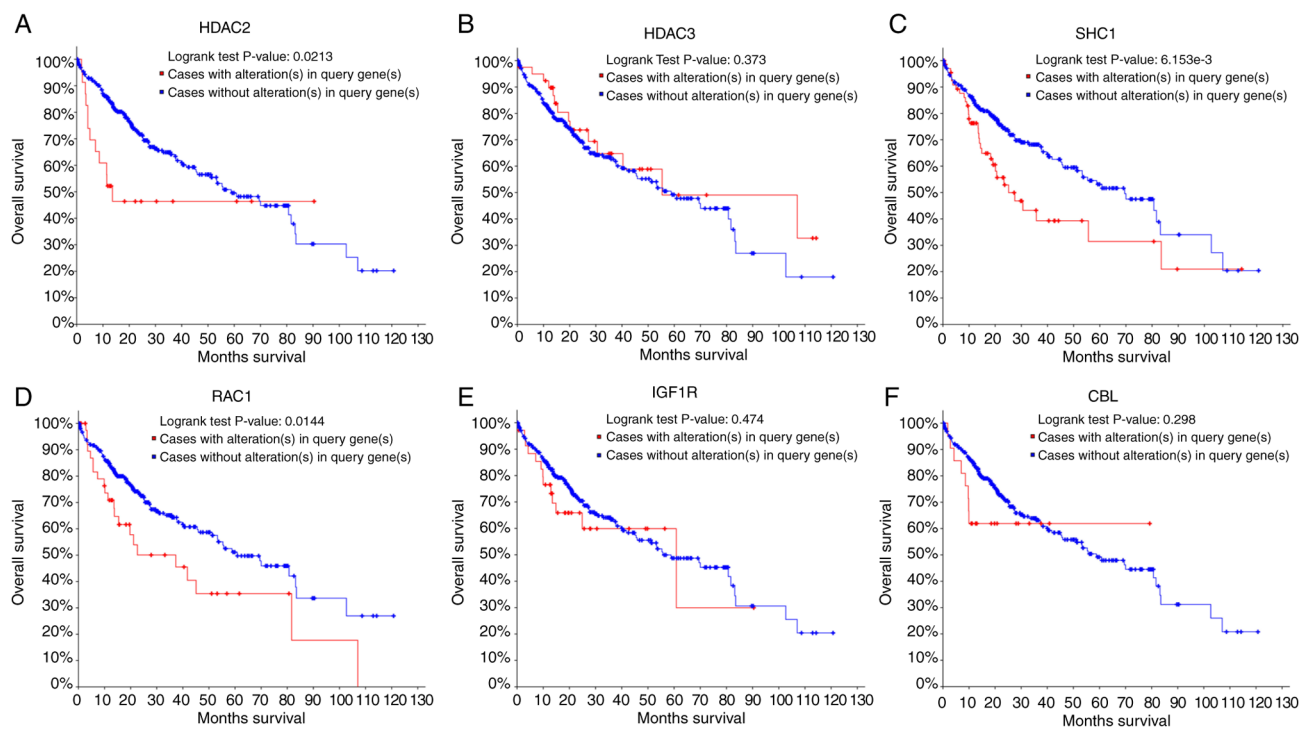

Figure S3. DFS curves of 360 HCC cases with or without alterations of hub genes. DFS curves for HCC cases based on (A) HDAC2 alteration (log rank  $P=6.488 \times 10^{-3}$ ), (B) HDAC3 alteration (log rank  $P=0.709$ ), (C) SHC1 alteration (log rank  $P=0.0347$ ), (D) RAC1 alteration (log rank  $P=0.516$ ), (E) IGF1R alteration (log rank  $P=6.991 \times 10^{-3}$ ) and (F) CBL alteration (log rank  $P=0.0827$ ). DFS, disease-free survival; HDAC, histone deacetylase; SHC1, SHC-transforming protein 1; RAC1, Ras-related protein Rac1; IGF1R, insulin like growth factor 1 receptor; CBL, E3 ubiquitin-protein ligase CBL.

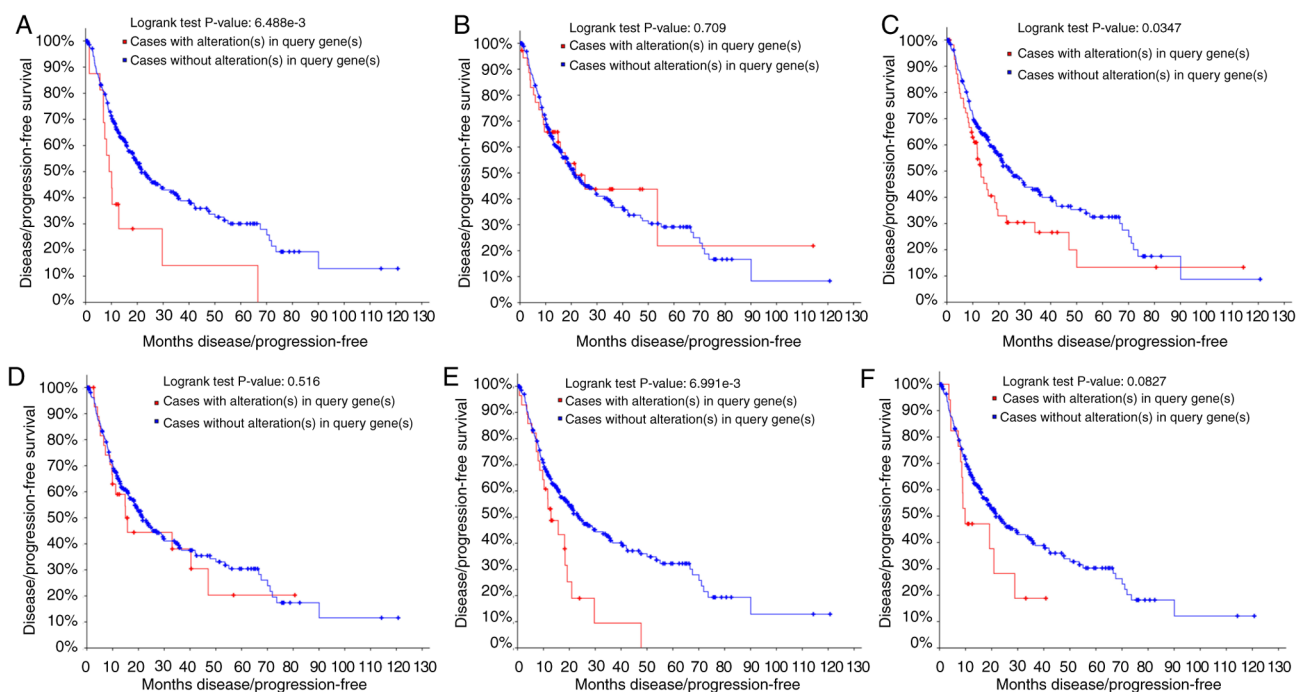

Figure S4. Splicing events of 2 hub genes. (A) Alternative splicing of SHC1-7856-AA was significantly decreased in HCC ( $P < 0.0001$ ). In the code SHC1-7856-AA, SHC1 is the gene symbol, 7856 denotes the order number of the splicing event in the dataset and AA indicates the type of splicing. (B) Alternative splicing of RAC1-78720-ES was significantly increased ( $P = 0.0253$ ) in HCC. AA, alternative acceptor; ES, exon skipping; SHC1, SHC-transforming protein 1; RAC1, Ras-related protein Rac1; HCC, hepatocellular carcinoma.

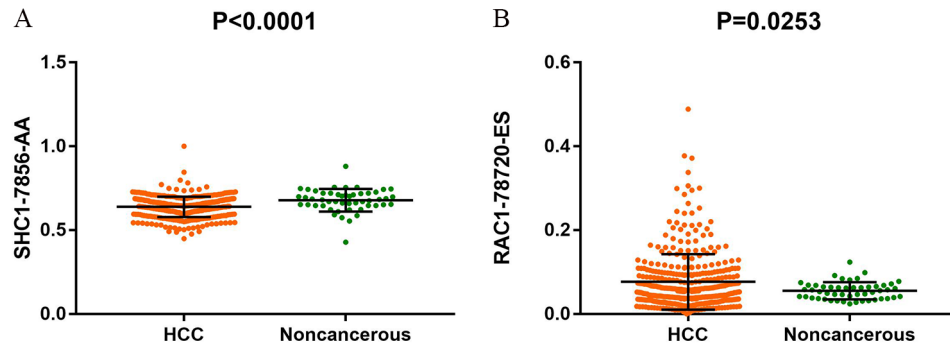

Table SI. Candidate hub genes of microRNA-100-5p.

| Gene      | Gene entrez ID |
|-----------|----------------|
| AACS      | 65985          |
| ABCC5     | 10057          |
| ACAP2     | 23527          |
| ACBD3     | 64746          |
| ACKR3     | 57007          |
| ACOT11    | 26027          |
| ADAM19    | 8728           |
| ADAMTS5   | 11096          |
| ADCY1     | 107            |
| AGO2      | 27161          |
| AGPAT4    | 56895          |
| ALG13     | 79868          |
| AMMECR1   | 9949           |
| ANKRD28   | 23243          |
| ANKRD49   | 54851          |
| ANKRD52   | 283373         |
| ANTXR1    | 84168          |
| APIAR     | 55435          |
| API3      | 130340         |
| API5      | 8539           |
| ARID3A    | 1820           |
| ARID3B    | 10620          |
| ASH2L     | 9070           |
| ATP11C    | 286410         |
| ATP2B4    | 493            |
| ATP6AP1   | 537            |
| BAG5      | 9529           |
| BAZ2A     | 11176          |
| BBX       | 56987          |
| BCAT1     | 586            |
| BEND6     | 221336         |
| BMP2      | 650            |
| BMPR2     | 659            |
| BRD3      | 8019           |
| BTBD9     | 114781         |
| C10orf25  | 220979         |
| C14orf28  | 122525         |
| C1orf115  | 79762          |
| C20orf166 | 128826         |
| C20orf194 | 25943          |
| C5orf22   | 55322          |
| C7orf26   | 79034          |
| C9orf170  | 401535         |
| CACNA1I   | 8911           |
| CACNG7    | 59284          |
| CAMTA1    | 23261          |
| CAND2     | 23066          |
| CASZ1     | 54897          |
| CBL       | 867            |
| CCDC113   | 29070          |
| CCDC124   | 115098         |
| CCDC134   | 79879          |
| CD274     | 29126          |
| CD93      | 22918          |
| CDC25A    | 993            |
| CDH6      | 1004           |
| CDS2      | 8760           |
| CEP104    | 9731           |
| CEP170B   | 283638         |

Table SI. Continued.

| Gene     | Gene entrez ID |
|----------|----------------|
| CEP85    | 64793          |
| CHST3    | 9469           |
| CIRBP    | 1153           |
| CLCN6    | 1185           |
| CLDN11   | 5010           |
| CLDN4    | 1364           |
| CLYBL    | 171425         |
| COG5     | 10466          |
| COL4A3BP | 10087          |
| COPS7B   | 64708          |
| COQ2     | 27235          |
| CPNE5    | 57699          |
| CROCC    | 9696           |
| CTDSP2   | 10106          |
| CTDSPL   | 10217          |
| CUX1     | 1523           |
| CWC25    | 54883          |
| CXCL16   | 58191          |
| CYP20A1  | 57404          |
| CYP26B1  | 56603          |
| CYP2W1   | 54905          |
| CYR1     | 116159         |
| DDX26B   | 203522         |
| DESI2    | 51029          |
| DFFB     | 1677           |
| DGCR2    | 9993           |
| DHRS13   | 147015         |
| DLG5     | 9231           |
| DNAJB7   | 150353         |
| DNAJC11  | 55735          |
| DNAJC5   | 80331          |
| DNASE2   | 1777           |
| DPY19L3  | 147991         |
| DUSP4    | 1846           |
| E2F2     | 1870           |
| E2F7     | 144455         |
| EDC3     | 80153          |
| EFNB2    | 1948           |
| ELFN2    | 114794         |
| ELOVL6   | 79071          |
| EMR2     | 30817          |
| EPB41L1  | 2036           |
| EPC2     | 26122          |
| EPDR1    | 54749          |
| ERGIC1   | 57222          |
| F11R     | 50848          |
| FAIM2    | 23017          |
| FAM105B  | 90268          |
| FAM110D  | 79927          |
| FAM115C  | 285966         |
| FAM126B  | 285172         |
| FAM129A  | 116496         |
| FAM163A  | 148753         |
| FAM49A   | 81553          |
| FAM63B   | 54629          |
| FAM64A   | 54478          |
| FARP1    | 10160          |
| FGF11    | 2256           |
| FGFR3    | 2261           |

Table SI. Continued.

| Gene     | Gene entrez ID |
|----------|----------------|
| FKBP5    | 2289           |
| FOXA1    | 3169           |
| FOXH1    | 8928           |
| FOXJ3    | 22887          |
| FOXO3    | 2309           |
| FRAT1    | 10023          |
| FRMD1    | 79981          |
| FRMD7    | 90167          |
| FSTL4    | 23105          |
| FZD1     | 8321           |
| FZD5     | 7855           |
| FZD7     | 8324           |
| FZD8     | 8325           |
| GABRA2   | 2555           |
| GALNT11  | 63917          |
| GATAD2B  | 57459          |
| GDE1     | 51573          |
| GDF11    | 10220          |
| GET4     | 51608          |
| GFM1     | 85476          |
| GMDS     | 2762           |
| GMEB2    | 26205          |
| GMPS     | 8833           |
| GNAO1    | 2775           |
| GNL3L    | 54552          |
| GNS      | 2799           |
| GOLGA3   | 2802           |
| GPR180   | 160897         |
| GPR26    | 2849           |
| GPR55    | 9290           |
| GPRC5B   | 51704          |
| GRM6     | 2916           |
| GTF3C1   | 2975           |
| HCAR3    | 8843           |
| HDAC2    | 3066           |
| HDAC3    | 8841           |
| HDHD2    | 84064          |
| HDLBP    | 3069           |
| HES7     | 84667          |
| HIP1     | 3092           |
| HIPK2    | 28996          |
| HIPK3    | 10114          |
| HLA-DOA  | 3111           |
| HLCS     | 3141           |
| HN1L     | 90861          |
| HOXA1    | 3198           |
| HOXC5    | 3222           |
| HS1BP3   | 64342          |
| HS3ST2   | 9956           |
| HS3ST3B1 | 9953           |
| HS6ST1   | 9394           |
| HSD17B13 | 345275         |
| HSD3B7   | 80270          |
| HSP90B1  | 7184           |
| HSPA12B  | 116835         |
| ICMT     | 23463          |
| IFIT2    | 3433           |
| IFIT3    | 3437           |
| IGF1R    | 3480           |

Table SI. Continued.

| Gene         | Gene entrez ID |
|--------------|----------------|
| IKZF4        | 64375          |
| IL22RA1      | 58985          |
| IMPDH1       | 3614           |
| INPP4A       | 3631           |
| INPP5E       | 56623          |
| INSM1        | 3642           |
| IRAK3        | 11213          |
| IREB2        | 3658           |
| JPH3         | 57338          |
| KBTBD11      | 9920           |
| KBTBD8       | 84541          |
| KCNA7        | 3743           |
| KCNJ11       | 3767           |
| KCTD15       | 79047          |
| KDM6B        | 23135          |
| KIAA0430     | 9665           |
| KIAA0754     | 643314         |
| KLF8         | 11279          |
| KMO          | 8564           |
| KMT2D        | 8085           |
| LAMA5        | 3911           |
| LDOC1L       | 84247          |
| LHFPL2       | 10184          |
| LIF          | 3976           |
| LOC101928125 | 101928125      |
| LPP          | 4026           |
| LPPR4        | 9890           |
| LRRC8B       | 23507          |
| LRRFIP2      | 9209           |
| LRRN1        | 57633          |
| LURAP1       | 541468         |
| MAN2A2       | 4122           |
| MAPRE2       | 10982          |
| MASP1        | 5648           |
| MBD3         | 53615          |
| MBNL1        | 4154           |
| MBTD1        | 54799          |
| MCC          | 4163           |
| MFHAS1       | 9258           |
| MPP3         | 4356           |
| MTF1         | 4520           |
| MTMR3        | 8897           |
| MTOR         | 2475           |
| MYCBP        | 26292          |
| MYCBPAP      | 84073          |
| MYH10        | 4628           |
| MYLK4        | 340156         |
| N4BP3        | 23138          |
| NARFL        | 64428          |
| NCMAP        | 400746         |
| NCS1         | 23413          |
| NDST1        | 3340           |
| NDUFA10      | 4705           |
| NEBL         | 10529          |
| NEFM         | 4741           |
| NIP7         | 51388          |
| NIPBL        | 25836          |
| NKAIN1       | 79570          |
| NKTR         | 4820           |

Table SI. Continued.

| Gene     | Gene entrez ID |
|----------|----------------|
| NLRC3    | 197358         |
| NLRP2    | 55655          |
| NOTCH1   | 4851           |
| NOX4     | 50507          |
| NPC1     | 4864           |
| NPR3     | 4883           |
| NR1I3    | 9970           |
| NR6A1    | 2649           |
| NT5DC3   | 51559          |
| NTSR1    | 4923           |
| NUDT19   | 390916         |
| NUP188   | 23511          |
| NUP62CL  | 54830          |
| NXF1     | 10482          |
| ONECUT2  | 9480           |
| OSBP2    | 23762          |
| OSBPL2   | 9885           |
| OTC      | 5009           |
| OTUD3    | 23252          |
| P2RX1    | 5023           |
| PACSIN1  | 29993          |
| PAPD7    | 11044          |
| PATE2    | 399967         |
| PAX2     | 5076           |
| PCDH7    | 5099           |
| PCSK9    | 255738         |
| PDLIM2   | 64236          |
| PDLIM4   | 8572           |
| PDXK     | 8566           |
| PEX19    | 5824           |
| PEX5L    | 51555          |
| PGR      | 5241           |
| PHC3     | 80012          |
| PHOX2B   | 8929           |
| PI15     | 51050          |
| PIK3IP1  | 113791         |
| PKNOX1   | 5316           |
| PLCL2    | 23228          |
| PLXDC1   | 57125          |
| PLXNA1   | 5361           |
| PNLIPRP3 | 119548         |
| PODXL    | 5420           |
| POLE     | 5426           |
| POLR2J2  | 246721         |
| POLR2J3  | 548644         |
| PPARGC1B | 133522         |
| PPFIA3   | 8541           |
| PPIF     | 10105          |
| PPM1H    | 57460          |
| PPP1R3F  | 89801          |
| PPP1R7   | 5510           |
| PPP2R3B  | 28227          |
| PPP3CA   | 5530           |
| PRDM1    | 639            |
| PRDM2    | 7799           |
| PREX1    | 57580          |
| PRKAB2   | 5565           |
| PRPH2    | 5961           |
| PTGES    | 9536           |

Table SI. Continued.

| Gene     | Gene entrez ID |
|----------|----------------|
| PTPN11   | 5781           |
| PTPRN2   | 5799           |
| PWP2     | 5822           |
| RAB3B    | 5865           |
| RAC1     | 5879           |
| RAP1B    | 5908           |
| RAPH1    | 65059          |
| RASA2    | 5922           |
| RASA3    | 22821          |
| RASGRP3  | 25780          |
| RASSF4   | 83937          |
| RASSF6   | 166824         |
| RAVER2   | 55225          |
| RBFA     | 79863          |
| RBM19    | 9904           |
| RBM22    | 55696          |
| RCBTB1   | 55213          |
| RELB     | 5971           |
| RHBDL3   | 162494         |
| RHEBL1   | 121268         |
| RMDN1    | 51115          |
| RMND5A   | 64795          |
| RNF144B  | 255488         |
| RNF213   | 57674          |
| RPTOR    | 57521          |
| RRAGD    | 58528          |
| RRN3     | 54700          |
| SAE1     | 10055          |
| SAP30BP  | 29115          |
| SASH3    | 54440          |
| SCNN1A   | 6337           |
| SCNN1G   | 6340           |
| SEMA4G   | 57715          |
| SEMA6A   | 57556          |
| SETD1B   | 23067          |
| SETX     | 23064          |
| SGCB     | 6443           |
| SGCD     | 6444           |
| SGPL1    | 8879           |
| SH3BP4   | 23677          |
| SHC1     | 6464           |
| SIRT7    | 51547          |
| SKI      | 6497           |
| SLC12A2  | 6558           |
| SLC14A1  | 6563           |
| SLC18A1  | 6570           |
| SLC25A38 | 54977          |
| SLC26A7  | 115111         |
| SLC27A4  | 10999          |
| SLC35F1  | 222553         |
| SLC39A1  | 27173          |
| SLC44A1  | 23446          |
| SLC8A2   | 6543           |
| SMAD7    | 4092           |
| SMARCA4  | 6597           |
| SMARCA5  | 8467           |
| SMARCD1  | 6602           |
| SMC1A    | 8243           |
| SMEK2    | 57223          |

Table SI. Continued.

| Gene       | Gene entrez ID |
|------------|----------------|
| SMPDL3B    | 27293          |
| SNX9       | 51429          |
| SORL1      | 6653           |
| SOX1       | 6656           |
| SPAG6      | 9576           |
| SPEN       | 23013          |
| SPN        | 6693           |
| SRCIN1     | 80725          |
| SRMS       | 6725           |
| SRRM3      | 222183         |
| SRSF3      | 6428           |
| SSTR1      | 6751           |
| ST5        | 6764           |
| ST6GALNAC4 | 27090          |
| STAT5B     | 6777           |
| STK17B     | 9262           |
| STK24      | 8428           |
| STK35      | 140901         |
| STMN3      | 50861          |
| SUDS3      | 64426          |
| SULF1      | 23213          |
| SV2B       | 9899           |
| SYP        | 6855           |
| TAOK1      | 57551          |
| TARDBP     | 23435          |
| TBC1D16    | 125058         |
| TBKBP1     | 9755           |
| TENM1      | 10178          |
| TFCP2L1    | 29842          |
| THAP2      | 83591          |
| THAP6      | 152815         |
| TIGD6      | 81789          |
| TIMM10B    | 26515          |
| TMC2       | 117532         |
| TMEM135    | 65084          |
| TMEM236    | 653567         |
| TMEM30A    | 55754          |
| TMEM87B    | 84910          |
| TMPRSS13   | 84000          |
| TNFAIP8L1  | 126282         |
| TNNI3K     | 51086          |
| TRIB1      | 10221          |
| TRIB2      | 28951          |
| TRIM2      | 23321          |
| TRIM41     | 90933          |
| TSPAN11    | 441631         |
| TSPAN14    | 81619          |
| TSPYL2     | 64061          |
| TSPYL4     | 23270          |
| TTC1       | 7265           |
| TTC22      | 55001          |
| TTC30A     | 92104          |
| TTC38      | 55020          |
| TTC39A     | 22996          |
| TLL7       | 79739          |
| TTYH3      | 80727          |
| U2SURP     | 23350          |
| UBE4A      | 9354           |
| UGCG       | 7357           |

Table SI. Continued.

| Gene     | Gene entrez ID |
|----------|----------------|
| UHRF1BP1 | 54887          |
| USP12    | 219333         |
| USP51    | 158880         |
| VENTX    | 27287          |
| VLDLR    | 7436           |
| VNN1     | 8876           |
| WDFY3    | 23001          |
| WWC3     | 55841          |
| XPNPEP3  | 63929          |
| XXYLT1   | 152002         |
| YIPF6    | 286451         |
| ZADH2    | 284273         |
| ZBTB4    | 57659          |
| ZBTB7A   | 51341          |
| ZCCHC12  | 170261         |
| ZDHHC18  | 84243          |
| ZFAT     | 57623          |
| ZFX      | 7543           |
| ZFYVE19  | 84936          |
| ZFYVE20  | 64145          |
| ZNF106   | 64397          |
| ZNF19    | 7567           |
| ZNF197   | 10168          |
| ZNF317   | 57693          |
| ZNF483   | 158399         |
| ZNF554   | 115196         |
| ZNF595   | 152687         |
| ZNF618   | 114991         |
| ZNF704   | 619279         |
| ZNF75A   | 7627           |
| ZNF786   | 136051         |
| ZNF845   | 91664          |
| ZNRF2    | 223082         |
| ZZEF1    | 23140          |
